# 1 Detection of maternal transmission of resistant Gram-negative 2 bacteria in a Cambodian hospital setting

3 Chalita Chomkatekaew<sup>1</sup>, Janjira Thaipadungpanit<sup>1,2</sup>, Pasco Hearn<sup>3</sup>, Sona Soeng<sup>3</sup>, Sreymom  
4 Pol<sup>3</sup>, Leakhena Neou<sup>4</sup>, Jill Hopkins<sup>2,3</sup>, Paul Turner<sup>2,3</sup>, Elizabeth M. Batty<sup>1,2</sup>

5  
6 1. Mahidol-Oxford Tropical Medicine Research Unit, Faculty of Tropical Medicine, Mahidol  
7 University, Bangkok, Thailand

8 2. Centre for Tropical Medicine and Global Health, Nuffield Department of Medicine, University  
9 of Oxford, Oxford, UK

10 3. Cambodia-Oxford Medical Research Unit, Angkor Hospital for Children, Siem Reap,  
11 Cambodia

12 4. Neonatal Unit, Angkor Hospital for Children, Siem Reap, Cambodia

13

14 Corresponding author: Elizabeth M. Batty, [elizabeth.b@tropmedres.ac](mailto:elizabeth.b@tropmedres.ac)

## 15 Abstract

16 Infection with Extended-spectrum beta-lactamase -producing *Enterobacterales* (ESBL-E) is  
17 common in infants leading to increased intensive care unit admission and mortality, but the role  
18 of maternal transmission in colonisation of infants is unclear. Using paired isolates from 50 pairs  
19 of mothers and neonates admitted to a Cambodian hospital, we investigated antimicrobial  
20 resistance in *Escherichia coli* and *Klebsiella pneumoniae* using whole genome sequencing. We  
21 detected a wide variety of ESBL-E genes present in this population along with high levels of  
22 multidrug resistance. From 21 pairs where the same organism was present in both mother and  
23 neonate, we identified eight pairs with identical or near-identical isolates from both individuals  
24 suggestive of transmission at or around birth, including a pair with transmission of multiple  
25 strains. We found no evidence for transmission of plasmids only from mother to infant. This  
26 suggests vertical transmission outside hospitals as a common cause of ESBL-E colonisation in  
27 neonates.

## 28 Introduction

29 Antimicrobial resistance (AMR) is a major global health problem, and multiple studies have  
30 shown high rates of AMR in low and middle-income countries in Southeast Asia compared to  
31 other regions [1–3]. AMR is a particular problem in neonates, where infection with Extended-  
32 spectrum beta-lactamase -producing *Enterobacterales* (ESBL-E) are common and associated  
33 with admission to ICU and death [4–6]. ESBL-E infections have become one of the main  
34 challenges for antibiotic treatment leading to the increase in mortality, healthcare cost and  
35 threatening the effectiveness of first line sepsis treatments in low resource countries such as  
36 Cambodia. Rates of ESBL-E in Cambodia have been shown to rise between 2012 and 2015.  
37 However, multidrug resistance infection cases in Cambodia may be under-reported compared to

38 neighboring countries due to lack of infrastructure [7], and AMR data in Cambodia is improving  
39 but currently limited [1].

40 Cambodia shows a high prevalence of ESBL-E colonisation in the early neonatal period [8]  
41 suggestive of mother-to-child transmission at or shortly after delivery. A high number of infants  
42 are likely to already be colonised prior to hospital admission, and community acquisition may be  
43 important in the neonatal population [9]. Maternal transmission has been implicated in ESBL-E  
44 acquisition by neonates by looking at prevalence [10], or by using matched antimicrobial  
45 resistance phenotypes [11], pulsed-field gel electrophoresis [12], repetitive element PCR typing  
46 [13] to compare strains between mother and infant. Most recently, the BARNARDS study  
47 identified identical isolates between mother and infant in *E. coli* using whole-genome  
48 sequencing, suggesting mother-to-child transmission in a large south Asian and African dataset  
49 [14].

50 Whole-genome sequencing (WGS) of clinical isolates has emerged as an invaluable tool with  
51 many applications in clinical microbiology including tracking outbreaks, monitoring trends in  
52 infections and investigating pathogen transmission routes [15]. Several studies have shown that  
53 high-resolution data from WGS is a proven tool to track the possible transmission of *Klebsiella*  
54 *pneumoniae* circulating both in the intensive care unit [16] and in an outbreak via plasmid  
55 transmission [17]. However, most current datasets are short-read data, and the assembly of  
56 short-reads datasets usually results in multiple contigs and ambiguous alignments instead of a  
57 complete genome [18]. To overcome this challenge, Oxford Nanopore MinION platform can  
58 produce long reads enabling improved quality genome assembly including complete assembly  
59 of plasmids [19].

60 We used whole-genome sequencing to obtain ESBL-E genomes from pairs of mothers and  
61 neonates admitted to Angkor Hospital for Children, Siem Reap, Cambodia. Using complete  
62 genomes generated using short- and long-read sequencing, we identified patterns of  
63 antimicrobial resistance and investigated potential transmission events between mothers and  
64 neonates to better understand the importance of maternal transmission versus community  
65 acquisition in early colonisation of neonates.  
66

## 67 Methods

### 68 Study location

69 Angkor Hospital for Children is a non-governmental paediatric referral hospital with a dedicated  
70 neonatal intensive care unit (NICU) and special care baby unit (SCBU). The hospital has no  
71 maternity unit, thus all neonatal admissions are outborn. Over a one year period all infants aged  
72  $\leq 28$  days were eligible for study enrolment on admission to the NICU or SCBU, excluding those  
73 who had any previous healthcare service exposure following delivery (e.g. overnight admission  
74 to a hospital / health centre or transfer from another AHC ward).  
75

### 76 Sample collection, isolation, and phenotyping

77 A rectal swab was taken from the infant within 24 hours of admission to the neonatal unit (at a  
78 median of 11 days of age [range 0 – 30]), and a maternal stool sample was collected as soon as  
79 possible after infant admission. Samples were cultured onsite on selective chromogenic ESBL  
80 detection agar (CHROMagar ESBL medium; CHROMagar, France) and all morphotypes  
81 followed up for analysis. Species identification was confirmed by standard biochemical tests and  
82 antimicrobial susceptibilities were determined by disk diffusion, following CLSI methodology and  
83 using 2017 breakpoints [20]. Double disk diffusion tests were done to confirm ESBL production  
84 (cefotaxime and ceftazidime with/without clavulanate; BBL, Becton Dickinson, USA).

85  
86

### 87 **Bacterial growth and DNA extraction**

88 96 isolates of *E. coli* and *K. pneumoniae* were cultured from frozen stocks (-80°C) and grown in  
89 LB broth at 37°C for 3 hours. 900 µl of bacterial culture was spun down at 21,200 rcf for 5  
90 minutes before the supernatant was removed. The bacterial cells were lysed with 600 µl of  
91 Nucleic lysis solution (Promega, USA) at 80°C for 10 minutes. The cell lysate was then  
92 transferred to a new tube containing 250 µl of glass beads with 5 µl of RNase A solution  
93 (Qiagen, Germany) and the cells were further lysed by vortexing for 10 minutes. The cell lysate  
94 was incubated at 37°C for 30 minutes to remove the RNA. The mixture was purified using  
95 magnetic beads (Agencourt AMPure XP beads, Beckman Coulter, USA) with a 1:4 volume ratio  
96 of lysate mixture and magnetic beads. The extracted DNA was redissolved in distilled sterilised  
97 water and then stored in the freezer (-20°C) prior to library preparation for sequencing.

98

### 99 **Sequencing**

100 Sequencing libraries were prepared from extracted DNA using Nextera Flex library preparation  
101 kits and sequenced on an Illumina MiSeq with 300bp paired-end reads.

102 36 isolates were selected for long-read sequencing. The Rapid Barcoding Kit (Nanopore, UK)  
103 was used to prepare DNA libraries according to the Nanopore protocol with 12 barcoded  
104 samples per flow cell. The prepared libraries were pooled and purified using an additional step  
105 with magnetic beads (Agencourt AMPure XP beads, Beckman Coulter, USA) using a 1:1  
106 volume ratio of pooled libraries and the magnetic beads. The purified libraries were then  
107 sequenced on a MinION R9.4 flow cell according to the Nanopore protocol. The sequences  
108 were deposited in the European Nucleotide Archive (ENA) at EMBL-EBI under project  
109 accession number PRJEB37551 <https://www.ebi.ac.uk/ena/browser/view/PRJEB37551>.

110

111

### 112 **Bioinformatic analysis**

113 Raw sequence data was processed using the Bactopia pipeline 1.4 [21]. Reads were mapped  
114 against *E. coli* K-12 substrain MG1655 reference sequence for all *Escherichia* isolates (  
115 [https://www.ncbi.nlm.nih.gov/assembly/GCF\\_000005845.2/](https://www.ncbi.nlm.nih.gov/assembly/GCF_000005845.2/)) and *K. pneumoniae* HS11286 (  
116 [https://www.ncbi.nlm.nih.gov/assembly/GCF\\_000240185.1/](https://www.ncbi.nlm.nih.gov/assembly/GCF_000240185.1/)) for all *Klebsiella* isolates, and the  
117 genome assemblies were also used as references for confirmation of transmission. Mashtree  
118 1.1.2 [22] was used to generate phylogenetic trees from all samples and visualised using ggtree  
119 3.1.2 [23]. Ska 1.0 [24] was used to perform split k-mer analysis using the default cutoffs (95%

120 kmer identity and <20 SNPs to call transmission clusters). Snippy 4.6.0 [25] was used to  
121 produce variant calls, and snippy-core was used to mask repetitive regions and produce a core  
122 SNP alignment. SNP distances between samples were called with snp-dists 0.6.3 [26]. MLST  
123 was determined using mlst 2.19.0 [27] and the PubMLST database [28]. Genome assemblies  
124 were performed using Unicycler 0.4.8 [29]. *Escherichia* species and phylogroups were  
125 determined using ClermonTyping [30]. *Klebsiella* phylogroups and virulence genes were  
126 obtained through Kleborate [31]. Antimicrobial resistance genes and mutations were determined  
127 using NCBI AMRFinder+ 3.8.4 [32] and upset plots were visualized using ComplexUpset. Platon  
128 1.5.0 [33] was used to identify contigs originating from plasmids and the mobilization proteins,  
129 replication proteins, and incompatibility groups on each contig. The Platon identification was  
130 used to determine whether the AMR genes were part of the chromosome or present on  
131 plasmids. Flanker 0.1.5 [34] was used to extract 20kb genomic regions surrounding AMR  
132 genes, treating plasmids as circular if the Unicycler assembler reported them as circular.  
133 Isolates were removed if the AMR gene was on a contig less than 5kb in length. Clinker [35]  
134 was used to visualise the regions, with links drawn between genes with 95% or greater identity.  
135

## 136 Results

137  
138 Between 23rd March 2016 and 13th March 2017, 121 isolates were cultured from swabs from  
139 50 pairs of mothers and infants. 25/50 (50%) of infants and 47/50 (94%) of mothers were  
140 colonised with an ESBL-E, including 17/50 pairs where both mother and infant were colonised  
141 with *E. coli* and 4/50 pairs colonised with *K. pneumoniae*. Nine pairs had the same species  
142 isolated from both mother and infant with identical antibiograms, which we considered as  
143 potential transmission pairs (Figure 1).  
144  
145

146 We sequenced 96 isolates in total on Illumina MiSeq - 68 isolates from 20 of the 21 pairs where  
147 both mother and infant were colonised, including eight of nine pairs considered as potential  
148 transmission pairs (one pair could not be retrieved for sequencing), and 28 other randomly  
149 selected isolates from the study. We sequenced up to four isolates per individual based on the  
150 number of distinct morphotypes identified during bacterial growth (Supplementary Table 1).  
151

152 We performed long-read sequencing on the 18 isolates identified as possible transmission pairs  
153 based on the phenotypic data, as well as 18 other isolates which were observed to have closely  
154 related core genomes or similar patterns of antimicrobial resistance genes based on Illumina  
155 data. We used hybrid assembly of the long and short-read data to obtain complete genomes  
156 and resolve the plasmids in these strains in order to confirm transmission events and identify  
157 whether these transmission events involved complete isolates, or plasmid horizontal  
158 transmission between different isolates. We obtained between 1 and 9 contigs for each of the  
159 36 isolates, including one contig of 4.5Mb or larger assumed to be the chromosome, and 0-8  
160 plasmid contigs per isolate.  
161

162 The species of each isolate was determined from the whole genome sequencing using  
163 ClermonTyping (for *Escherichia* species) and Kleborate (for *Klebsiella* species). This showed  
164 that the *K. pneumoniae* isolates included three isolates of *Klebsiella quasipneumoniae* subsp.  
165 *similipneumoniae* and one isolate of *Klebsiella quasipneumoniae* subsp. *quasipneumoniae*, and  
166 the *E. coli* isolates included three isolates of *Escherichia fergusonii* and two isolates of  
167 *Escherichia clade-1* (Figure 2).

168  
169 No phylogroups or MLST were predominant in the isolates. Among *E. coli* isolates, the most  
170 common MLST was ST38 and the closely related ST3268 and ST3052 and ST318, as well as  
171 three isolates from the ST131 pandemic clade (Supplementary Figure 1). Of the three ST131  
172 isolates, two were clade C and one was clade A. In the *K. pneumoniae* isolates there were no  
173 dominant sequence types, with ST17 the only sequence type present more than once in  
174 unpaired isolates, and four isolates had novel sequence types (Supplementary Figure 2). No  
175 virulence determinants were found in the *K. pneumoniae* isolates and all had a virulence score  
176 of 0 as determined by Kleborate.

177

### 178 **Antimicrobial resistance**

179

180 95 of 96 isolates had an ESBL gene present in the genome, as expected as they were selected  
181 for the presence of ESBLs. One isolate (EbB064) had no ESBL genes present in the sequenced  
182 genome, despite having phenotypic resistance to 3rd generation cephalosporins. Four  
183 *Klebsiella pneumoniae* and one *Klebsiella quasipneumoniae* subsp. *similipneumoniae* isolates  
184 had *bla*<sub>SHV-2A</sub> genes predicted to cause ESBL resistance, with two cases of *bla*<sub>SHV-2A</sub> carried on a  
185 plasmid, one case where the gene is chromosomal, and one pair of isolates carrying the gene  
186 on both a plasmid and in the chromosome. Multidrug resistance was extremely common in  
187 these isolates, with 64% (61/96) of isolates genotypically resistant to 6 antimicrobial classes,  
188 including 2 isolates resistant to 8 classes (Figure 3). No carbapenemase resistance was found  
189 in this dataset. Colistin resistance was observed through presence of *mcr-1.1* and *mcr-3.5*  
190 genes in three *E. coli* isolates. A point mutation of *pmrB* (R256G) was reported in three *K.*  
191 *pneumoniae* isolates but this has been previously demonstrated not to cause colistin resistance  
192 in isolation [36] and we did not consider these isolates resistant. AMRfinder analysis reported  
193 resistance to phenicol/quinolone via *oqxAB* and resistance to fosfomycin via *fosA* in *K.*  
194 *pneumoniae*, but Kleborate confirmed these were intrinsic and no acquired resistance was  
195 reported, and so these isolates were not recorded as resistant through presence of these genes  
196 [31].

197

198 A wide range of beta-lactamase genes were carried, including 9 different *bla*<sub>CTX-M</sub> genes, and  
199 genes from the *bla*<sub>CMY</sub>, *bla*<sub>OXA</sub>, *bla*<sub>DHA</sub>, *bla*<sub>SHV</sub> and *bla*<sub>VEB</sub> families (Figure 4). The most common  
200 were *bla*<sub>CTX-M-15</sub>, found in 31 isolates, and *bla*<sub>CTX-M-55</sub>, found in 24 isolates. 25 isolates had an  
201 ESBL gene in the chromosome, while 7 isolates had ESBL genes present on plasmids as well  
202 as integrated into the chromosome.

203

### 204 **Identification of transmission events**

205

206 For each potential pair of isolates from a mother-infant pair, we identified potential transmission  
207 events as either transmission of a strain with complete genome (chromosome only, or  
208 chromosome and plasmid), transmission of plasmids, or no transmission.

209  
210 For eight of the nine pairs which had the same antibiogram in both strains, the mother and infant  
211 strains shared the same MLST and the same set of acquired antimicrobial resistance genes,  
212 and a further pair of isolates differed only by one antimicrobial resistance gene. We used split k-  
213 mer analysis to identify transmission clusters in the complete dataset, and confirmed this using  
214 the complete genome assembled from one of the paired strains as a reference for mapping and  
215 variant calling. We removed variant calls in repetitive regions but did not correct for  
216 recombination as we assume no recombination will occur in the timeframe of maternal  
217 transmission.

218  
219 Eight of these nine pairs were identified as transmission clusters using skat with default filters  
220 (95% kmer similarity and a SNP distance threshold of 20), and had 0-4 SNP differences  
221 between them (Figure 5). To confirm these results, we used one strain from each pair as a  
222 reference genome, and performed mapping and variant calling. Mapping to one pair as a  
223 reference gave similar results in all cases with 0-4 SNP differences from the mapping-based  
224 approach. We identified one pair where complete strains of both *E. coli* and *K. pneumoniae*  
225 were transmitted.

226  
227 We also looked at two other pairs of isolates from the whole collection which were identified as  
228 a possible transmission cluster by skat (Figure 5). In one case, the two isolates (EbB096 and  
229 EbB097) were from the same individual, and likely represent the same isolate which was  
230 sequenced twice due to appearing as different morphotypes during bacterial growth. The other  
231 pair of isolates (EbB002 and EbB018) were identified as a transmission cluster by skat, but with  
232 14 SNP differences between the isolates. Mapping to one of the paired isolates as a reference  
233 gave similar results, with 13 SNP differences between isolates. This pair of isolates came from  
234 an unpaired mother and infant, and were collected 54 days apart.

235  
236 For each of the transmission pairs we performed whole genome alignment using minimap to  
237 determine if the transmission included plasmids. Seven of the eight transmission clusters  
238 included plasmids, with only one pair where only the chromosome was present in both  
239 assemblies. While the plasmids appear to be transmitted in all strains, in three of the eight  
240 transmitted pairs there were rearrangements between plasmids. In one pair (isolates EbB065  
241 and EbB066), one isolate had two circular contigs of 280kb and 95kb, while the other isolate  
242 has only one non-circular contig of 372kb, which likely represents a misassembly of two  
243 plasmids into one contig (Supplementary Figure 3). In another pair (EbB043 and EbB045), an  
244 88kb non-circular contig from one isolate is present in the chromosome of the paired isolate,  
245 representing either a misassembly, or potentially insertion into the chromosome (Supplementary  
246 Figure 4). In a third pair (EbB104 and EbB105), the same plasmid material is assembled into a  
247 single plasmid in both strains, but with rearrangements between the plasmids, including a  
248 tandem duplication of the *bla*<sub>CTX-M-65</sub> gene seen in two copies in EbB104 and three copies in  
249 EbB105 (Supplementary Figure 5).

250 We also considered the possibility that maternal transmission of plasmids could occur in the  
251 absence of transmission of a complete strain, which would not be discovered using mapping-  
252 based approaches but may be identified by similar antimicrobial resistance profiles. To check for  
253 plasmid-borne resistance genes shared between strains, we compared the antimicrobial  
254 resistance profiles of all strains. There were no cases of identical or near-identical antimicrobial  
255 resistance profiles in paired strains which do not have similar core genomes. We did identify  
256 three clusters of unpaired samples with identical or near-identical antimicrobial resistance  
257 profiles which do not have similar core genomes: EbB004 and EbB039, EbB031 and EbB041,  
258 and EbB036/EbB037 and EbB091.

259  
260 Strains EbB004 has a 127kb plasmid carrying *incFII* and *incFIB*, while EbB039 has a 221kb  
261 plasmid with *incFII*, *incFIB*, *col156* and *P0111* replicons. The two plasmids shared a 50kb  
262 segment with an internal inversion, including the *bla<sub>CTX-M-27</sub>* gene, and eight other genes  
263 conferring resistance to aminoglycosides, trimethoprim, macrolides, sulfonamides, and  
264 tetracycline.

265  
266 Strains EbB031 and Eb041 both belong to ST44 and have a SNP distance of 349 measured by  
267 *skA*. They also share a 170kb plasmid with a similar resistance cassette carrying both *bla<sub>CTX-M-15</sub>*  
268 and *bla<sub>OXA-1</sub>*, as well as resistance to aminoglycosides, trimethoprim, macrolides, sulfonamides,  
269 tetracycline, and chloramphenicol.

270  
271 Strains EbB036 and EbB037 are a transmission pair which share an antimicrobial resistance  
272 profile with strain EbB091. However, none of these strains contain plasmids, and the shared  
273 resistance profiles are driven by chromosomal *qnrS1* and *bla<sub>CTX-M-15</sub>* integrated in different  
274 locations.

275  
276 Finally we looked at the genomic context of ESBLs found in more than one strain to determine if  
277 shared mobile elements were driving the spread of ESBLs in this dataset. Observing the 20kb  
278 regions around each ESBL, many of the ESBL genes were present in different contexts and  
279 were not present on shared plasmids or as shared mobile elements integrated into plasmids or  
280 chromosomes.

## 281 282 **Discussion**

283  
284 We use complete genomes combining short and long-read sequencing to show that maternal  
285 transmission is an important source of neonatal colonisation. We document seven cases of  
286 maternal transmission across 50 pairs of mothers and infants, which may be an underestimate if  
287 the colony selection on the basis of differing morphology did not represent the full diversity of *E.*  
288 *coli* and *K. pneumoniae* carriage. In eight of nine transmitted strains, the strain was transmitted  
289 with all plasmids intact.

290  
291 We identified potential transmission pairs in this study by looking for similar patterns of  
292 phenotypic antimicrobial resistance. Using similar antimicrobial resistance phenotypes in the  
293 same organism as the sole criteria for detecting transmission, we would have detected all of the

294 transmission pairs, and called only one false positive transmission. Using similar antimicrobial  
295 resistance and requiring the same MLST would have successfully detected all transmission  
296 pairs confirmed using complete genomes, and would have excluded the false positive. This  
297 suggests that previous studies of maternal transmission using MLST or PFGE genotyping to  
298 identify transmissions are likely to have correctly called transmission events. However, we  
299 detected at least one pair of isolates which were closely related but are from individuals from  
300 unrelated pairs and do not represent maternal transmission between these individuals. As the  
301 samples were collected on admission to the hospital, this is more likely to be community  
302 transmission than due to a common source in the hospital. This suggests that community  
303 transmission of isolates can give rise to results which are similar to maternal transmission and  
304 may confound transmission studies, particularly if a SNP threshold for transmission cannot be  
305 easily identified.

306  
307 The isolates in this study were pre-selected to include only those with ESBLs and may not  
308 represent a true population survey. Previous estimates of carriage rates in Cambodia have  
309 ranged from 20% in rural villages in 2011 [37], 42.7% for *E. coli* and 33.7% for *K. pneumoniae*  
310 between 2012 and 2015 [38], and 92.8% for *E. coli* and 44.1% for *K. pneumoniae* in Siem Reap  
311 province in 2019 [39]. Despite the selection for ESBL carriage, the results are largely  
312 concordant with previous studies investigating all isolates, with high levels of genetic diversity,  
313 no dominant sequence types, and a range of antimicrobial resistance genes [40]. Despite the  
314 presence of ST131 isolates in this dataset, they were not dominant in carriage. A wide range of  
315 ESBL genes were seen in these isolates, with *bla*<sub>CTX-M-15</sub> and *bla*<sub>CTX-M-55</sub> the most common, but  
316 no dominant gene or lineage. Previous studies have reported hypervirulent *K. pneumoniae*  
317 clones as a cause of community-acquired infection in southeast Asia [41], but we did not detect  
318 any *K. pneumoniae* virulence genes in this dataset.

319  
320 We were unable to find any examples of transmission of plasmids between mothers and infants  
321 outside the transmission of a complete strain. Across the whole dataset there were few shared  
322 plasmids outside transmission pairs, indicating that no dominant plasmids are responsible for  
323 the spread of antimicrobial resistance. The few strains with similar plasmids from unrelated  
324 individuals, such as EbB031 and EbB041, were also closely related in the core genome and  
325 suggests community circulation of strains rather than plasmid transmission. The complete  
326 genome sequences allowed us to look at the different antimicrobial resistance genes in context,  
327 and show that the ESBL genes are present in different contexts in both plasmid and  
328 chromosome, and that no common transposable element is responsible for antimicrobial  
329 resistance transmission in this dataset. Our limited set of ST131 genomes showed the  
330 characteristic *incF* plasmids carrying *bla*<sub>CTX-M-27</sub>, as previously reported as part of the diverse  
331 plasmidome of ST131 [42].

332  
333 Our study suggests that vertical transmission outside the hospital is a common source of  
334 neonatal colonisation. Strategies to reduce neonatal infections need to consider that maternal  
335 transmission is a frequent occurrence, and that AMR strains are circulating in the community  
336 and widely carried by mothers and infants. Strategies which focus solely on hospital-based



337 intervention may be unsuccessful at preventing transmission and colonisation which occurs in  
338 the community.

339

#### 340 **Ethics statement**

341 The study was approved by Angkor Hospital for Children (0034/16-AHC), the Cambodia  
342 National Ethics Committee for Health Research (464-NECHR) and the Oxford Tropical  
343 Research Ethics Committee (575-15).

344

#### 345 **Data summary**

346 Raw sequence data generated in this study were deposited in the European Nucleotide Archive  
347 (ENA) at EMBL-EBI under project accession number PRJEB37551

348 <https://www.ebi.ac.uk/ena/browser/view/PRJEB37551>

349

#### 350 **Funding**

351 The study was funded by the University of Oxford John Fell Fund and Wellcome Trust Core  
352 Award Grant Number 106698/Z/16/Z. The computational aspects of this research were  
353 supported by the Wellcome Trust Core Award Grant Number 203141/Z/16/Z and the NIHR  
354 Oxford BRC. The views expressed are those of the author(s) and not necessarily those of the  
355 NHS, the NIHR or the Department of Health. This publication made use of the PubMLST  
356 website (<https://pubmlst.org/>) developed by Keith Jolley and sited at the University of Oxford.  
357 The development of that website was funded by the Wellcome Trust.

358

#### 359 **Conflicts of interest**

360 Authors declare no conflicts of interest.

361

362

363

#### 364 **References**

365

- 366 1. Reed TAN, Krang S, Miliya T, Townell N, Letchford J, Bun S, et al. Antimicrobial resistance  
367 in Cambodia: a review. *Int J Infect Dis.* 2019;85: 98–107. doi:10.1016/j.ijid.2019.05.036
- 368 2. Woerther P-L, Burdet C, Chachaty E, Andremont A. Trends in human fecal carriage of  
369 extended-spectrum  $\beta$ -lactamases in the community: toward the globalization of CTX-M. *Clin*  
370 *Microbiol Rev.* 2013;26: 744–758. doi:10.1128/CMR.00023-13
- 371 3. Zellweger RM, Carrique-Mas J, Limmathurotsakul D, Day NPJ, Thwaites GE, Baker S, et  
372 al. A current perspective on antimicrobial resistance in Southeast Asia. *J Antimicrob*  
373 *Chemother.* 2017;72: 2963–2972. doi:10.1093/jac/dkx260
- 374 4. Fox-Lewis A, Takata J, Miliya T, Lubell Y, Soeng S, Sar P, et al. Antimicrobial Resistance in  
375 Invasive Bacterial Infections in Hospitalized Children, Cambodia, 2007-2016. *Emerg Infect*  
376 *Dis.* 2018;24: 841–851. doi:10.3201/eid2405.171830
- 377 5. Roberts T, Limmathurotsakul D, Turner P, Day NPJ, Vandepitte WP, Cooper BS.  
378 Antimicrobial-resistant Gram-negative colonization in infants from a neonatal intensive care

- 379 unit in Thailand. *J Hosp Infect.* 2019;103: 151–155. doi:10.1016/j.jhin.2019.04.004
- 380 6. Stoesser N, Giess A, Batty EM, Sheppard AE, Walker AS, Wilson DJ, et al. Genome  
381 sequencing of an extended series of NDM-producing *Klebsiella pneumoniae* isolates from  
382 neonatal infections in a Nepali hospital characterizes the extent of community- versus  
383 hospital-associated transmission in an endemic setting. *Antimicrob Agents Chemother.*  
384 2014;58: 7347–7357. doi:10.1128/AAC.03900-14
- 385 7. Vlieghe E, Sary S, Lim K, Sivuthy C, Phe T, Parry C, et al. First National Workshop on  
386 Antibiotic Resistance in Cambodia: Phnom Penh, Cambodia, 16-18 November 2011. *J*  
387 *Glob Antimicrob Resist.* 2013;1: 31–34. doi:10.1016/j.jgar.2013.01.007
- 388 8. Turner P, Pol S, Soeng S, Sar P, Neou L, Chea P, et al. High Prevalence of Antimicrobial-  
389 resistant Gram-negative Colonization in Hospitalized Cambodian Infants. *Pediatr Infect Dis*  
390 *J.* 2016;35: 856–861. doi:10.1097/INF.0000000000001187
- 391 9. Smit PW, Stoesser N, Pol S, van Kleef E, Oonsivilai M, Tan P, et al. Transmission  
392 Dynamics of Hyper-Endemic Multi-Drug Resistant *Klebsiella pneumoniae* in a Southeast  
393 Asian Neonatal Unit: A Longitudinal Study With Whole Genome Sequencing. *Front*  
394 *Microbiol.* 2018;9: 1197. doi:10.3389/fmicb.2018.01197
- 395 10. Heigl K, Zamfir M, Adler AC, Dammeyer A, Schomacher L, Karlin B, et al. Prevalence of  
396 methicillin-sensitive, methicillin-resistant *Staphylococcus aureus*, and extended-spectrum  
397 beta-lactamase-producing *Escherichia coli* in newborns: a cross-sectional study. *J Matern*  
398 *Fetal Neonatal Med.* 2020; 1–12. doi:10.1080/14767058.2020.1849100
- 399 11. Frank Wolf M, Abu Shqara R, Naskovica K, Zilberfarb IA, Sgayer I, Glikman D, et al.  
400 Vertical Transmission of Extended-Spectrum, Beta-Lactamase-Producing  
401 Enterobacteriaceae during Preterm Delivery: A Prospective Study. *Microorganisms.* 2021;9.  
402 doi:10.3390/microorganisms9030506
- 403 12. Rettedal S, Løhr IH, Bernhoff E, Natås OB, Sundsfjord A, Øymar K. Extended-spectrum  $\beta$ -  
404 lactamase-producing Enterobacteriaceae among pregnant women in Norway: prevalence  
405 and maternal-neonatal transmission. *J Perinatol.* 2015;35: 907–912. doi:10.1038/jp.2015.82
- 406 13. Peretz A, Skuratovsky A, Khabra E, Adler A, Pastukh N, Barak S, et al. Peripartum  
407 maternal transmission of extended-spectrum  $\beta$ -lactamase organism to newborn infants.  
408 *Diagn Microbiol Infect Dis.* 2017;87: 168–171. doi:10.1016/j.diagmicrobio.2016.11.004
- 409 14. Carvalho MJ, Sands K, Thomson K, Portal E, Mathias J, Milton R, et al. Antibiotic  
410 resistance genes in the gut microbiota of mothers and linked neonates with or without  
411 sepsis from low- and middle-income countries. *Nat Microbiol.* 2022;7: 1337–1347.  
412 doi:10.1038/s41564-022-01184-y
- 413 15. Didelot X, Bowden R, Wilson DJ, Peto TEA, Crook DW. Transforming clinical microbiology  
414 with bacterial genome sequencing. *Nat Rev Genet.* 2012;13: 601–612.  
415 doi:10.1038/nrg3226
- 416 16. Gorrie CL, Mirceta M, Wick RR, Edwards DJ, Thomson NR, Strugnell RA, et al.  
417 Gastrointestinal Carriage Is a Major Reservoir of *Klebsiella pneumoniae* Infection in  
418 Intensive Care Patients. *Clin Infect Dis.* 2017;65: 208–215. doi:10.1093/cid/cix270

- 419 17. Mathers AJ, Cox HL, Kitchel B, Bonatti H, Brassinga AKC, Carroll J, et al. Molecular  
420 dissection of an outbreak of carbapenem-resistant enterobacteriaceae reveals Intergenous  
421 KPC carbapenemase transmission through a promiscuous plasmid. *MBio*. 2011;2: e00204–  
422 11. doi:10.1128/mBio.00204-11
- 423 18. Treangen TJ, Salzberg SL. Repetitive DNA and next-generation sequencing: computational  
424 challenges and solutions. *Nat Rev Genet*. 2011;13: 36–46. doi:10.1038/nrg3117
- 425 19. Koren S, Phillippy AM. One chromosome, one contig: complete microbial genomes from  
426 long-read sequencing and assembly. *Curr Opin Microbiol*. 2015;23: 110–120.  
427 doi:10.1016/j.mib.2014.11.014
- 428 20. CLSI. Performance Standards for Antimicrobial Susceptibility Testing. CLSI document  
429 M100-S27. 27th Edition. Wayne PA, editor. Clinical and Laboratory Standards Institute;  
430 2017.
- 431 21. Petit RA 3rd, Read TD. Bactopia: a Flexible Pipeline for Complete Analysis of Bacterial  
432 Genomes. *mSystems*. 2020;5. doi:10.1128/mSystems.00190-20
- 433 22. Katz L. mashree: Create a tree using Mash distances. Github; Available:  
434 <https://github.com/lskatz/mashree>
- 435 23. Yu G, Smith DK, Zhu H, Guan Y, Lam TT-Y. ggtree : an r package for visualization and  
436 annotation of phylogenetic trees with their covariates and other associated data. McInerny  
437 G, editor. *Methods Ecol Evol*. 2017;8: 28–36. doi:10.1111/2041-210X.12628
- 438 24. Harris SR. SKA: Split Kmer Analysis Toolkit for Bacterial Genomic Epidemiology. *bioRxiv*.  
439 2018. p. 453142. doi:10.1101/453142
- 440 25. Seemann T. snippy. Github; Available: <https://github.com/tseemann/snippy>
- 441 26. Seemann T. snp-dists: Pairwise SNP distance matrix from a FASTA sequence alignment.  
442 Github; Available: <https://github.com/tseemann/snp-dists>
- 443 27. Seemann T. mlst: Scan contig files against PubMLST typing schemes. Github; Available:  
444 <https://github.com/tseemann/mlst>
- 445 28. Jolley KA, Maiden MCJ. BIGSdb: Scalable analysis of bacterial genome variation at the  
446 population level. *BMC Bioinformatics*. 2010;11: 595. doi:10.1186/1471-2105-11-595
- 447 29. Wick RR, Judd LM, Gorrie CL, Holt KE. Unicycler: Resolving bacterial genome assemblies  
448 from short and long sequencing reads. *PLoS Comput Biol*. 2017;13: e1005595.  
449 doi:10.1371/journal.pcbi.1005595
- 450 30. Beghain J, Bridier-Nahmias A, Le Nagard H, Denamur E, Clermont O. ClermonTyping: an  
451 easy-to-use and accurate in silico method for Escherichia genus strain phylotyping. *Microb*  
452 *Genom*. 2018;4. doi:10.1099/mgen.0.000192
- 453 31. Lam MMC, Wick RR, Watts SC, Cerdeira LT, Wyres KL, Holt KE. A genomic surveillance  
454 framework and genotyping tool for Klebsiella pneumoniae and its related species complex.  
455 *Nat Commun*. 2021;12: 4188. doi:10.1038/s41467-021-24448-3
- 456 32. Feldgarden M, Brover V, Haft DH, Prasad AB, Slotta DJ, Tolstoy I, et al. Validating the

- 457 AMRFinder Tool and Resistance Gene Database by Using Antimicrobial Resistance  
458 Genotype-Phenotype Correlations in a Collection of Isolates. *Antimicrob Agents*  
459 *Chemother.* 2019;63. doi:10.1128/AAC.00483-19
- 460 33. Schwengers O, Barth P, Falgenhauer L, Hain T, Chakraborty T, Goesmann A. Platon:  
461 identification and characterization of bacterial plasmid contigs in short-read draft  
462 assemblies exploiting protein sequence-based replicon distribution scores. *Microb Genom.*  
463 2020. doi:10.1099/mgen.0.000398
- 464 34. Matlock W, Lipworth S, Constantinides B, Peto TEA, Walker AS, Crook D, et al. Flanker: a  
465 tool for comparative genomics of gene flanking regions. *Microb Genom.* 2021;7.  
466 doi:10.1099/mgen.0.000634
- 467 35. Gilchrist CLM, Chooi Y-H. Clinker & clustermap.js: Automatic generation of gene cluster  
468 comparison figures. *Bioinformatics.* 2021. doi:10.1093/bioinformatics/btab007
- 469 36. Cheng Y-H, Lin T-L, Pan Y-J, Wang Y-P, Lin Y-T, Wang J-T. Colistin resistance  
470 mechanisms in *Klebsiella pneumoniae* strains from Taiwan. *Antimicrob Agents Chemother.*  
471 2015;59: 2909–2913. doi:10.1128/AAC.04763-14
- 472 37. Atterby C, Osbjør K, Tepper V, Rajala E, Hernandez J, Seng S, et al. Carriage of  
473 carbapenemase- and extended-spectrum cephalosporinase-producing *Escherichia coli* and  
474 *Klebsiella pneumoniae* in humans and livestock in rural Cambodia; gender and age  
475 differences and detection of blaOXA-48 in humans. *Zoonoses Public Health.* 2019;66: 603–  
476 617. doi:10.1111/zph.12612
- 477 38. Caron Y, Chheang R, Puthea N, Soda M, Boyer S, Tarantola A, et al. Beta-lactam  
478 resistance among Enterobacteriaceae in Cambodia: The four-year itch. *Int J Infect Dis.*  
479 2018;66: 74–79. doi:10.1016/j.ijid.2017.10.025
- 480 39. Singh SR, Mao B, Evdokimov K, Tan P, Leab P, Ong R, et al. Prevalence of MDR organism  
481 (MDRO) carriage in children and their household members in Siem Reap Province,  
482 Cambodia. *JAC Antimicrob Resist.* 2020;2: dlaa097. doi:10.1093/jacamr/dlaa097
- 483 40. Huynh B-T, Passet V, Rakotondrasoa A, Diallo T, Kerleguer A, Hennart M, et al. *Klebsiella*  
484 *pneumoniae* carriage in low-income countries: antimicrobial resistance, genomic diversity  
485 and risk factors. *Gut Microbes.* 2020;11: 1287–1299. doi:10.1080/19490976.2020.1748257
- 486 41. Wyres KL, Lam MMC, Holt KE. Population genomics of *Klebsiella pneumoniae*. *Nat Rev*  
487 *Microbiol.* 2020;18: 344–359. doi:10.1038/s41579-019-0315-1
- 488 42. Kondratyeva K, Salmon-Divon M, Navon-Venezia S. Meta-analysis of Pandemic  
489 *Escherichia coli* ST131 Plasmidome Proves Restricted Plasmid-clade Associations. *Sci*  
490 *Rep.* 2020;10: 36. doi:10.1038/s41598-019-56763-7

491

492

493

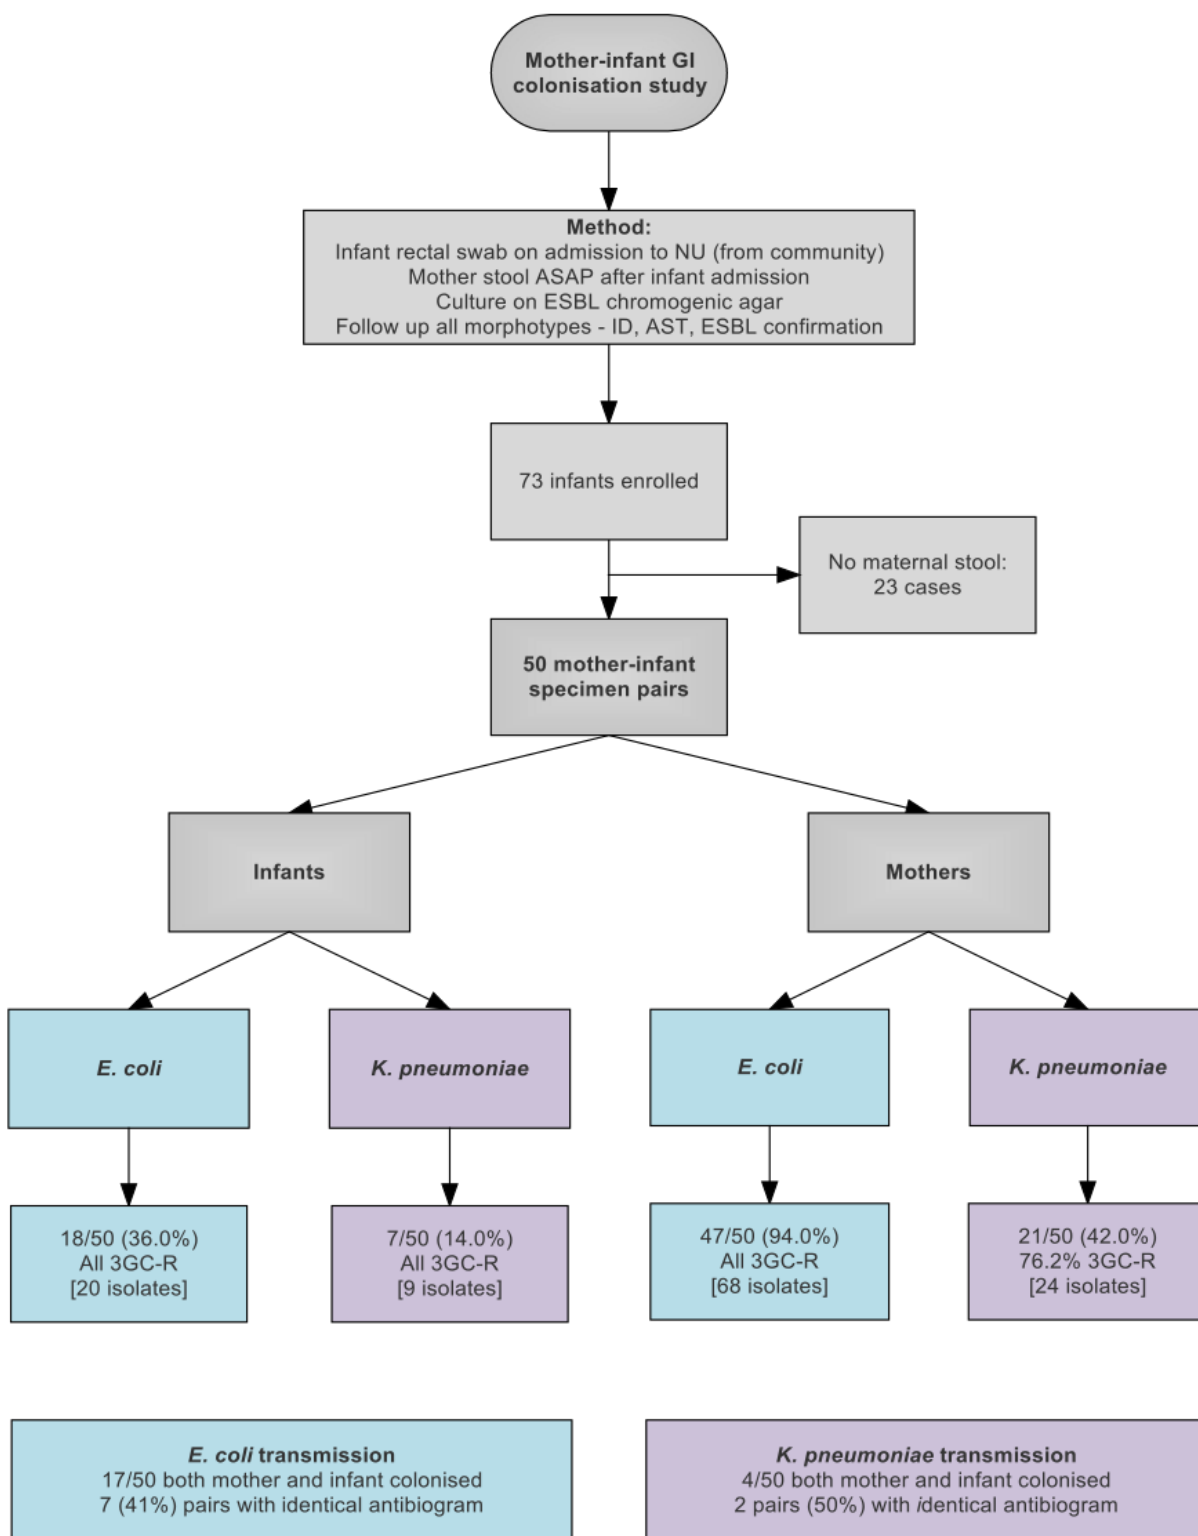

494  
495 **Figure 1:** Flow diagram showing study design and sample collection. 3GC-R: third generation  
496 cephalosporin resistant.

497

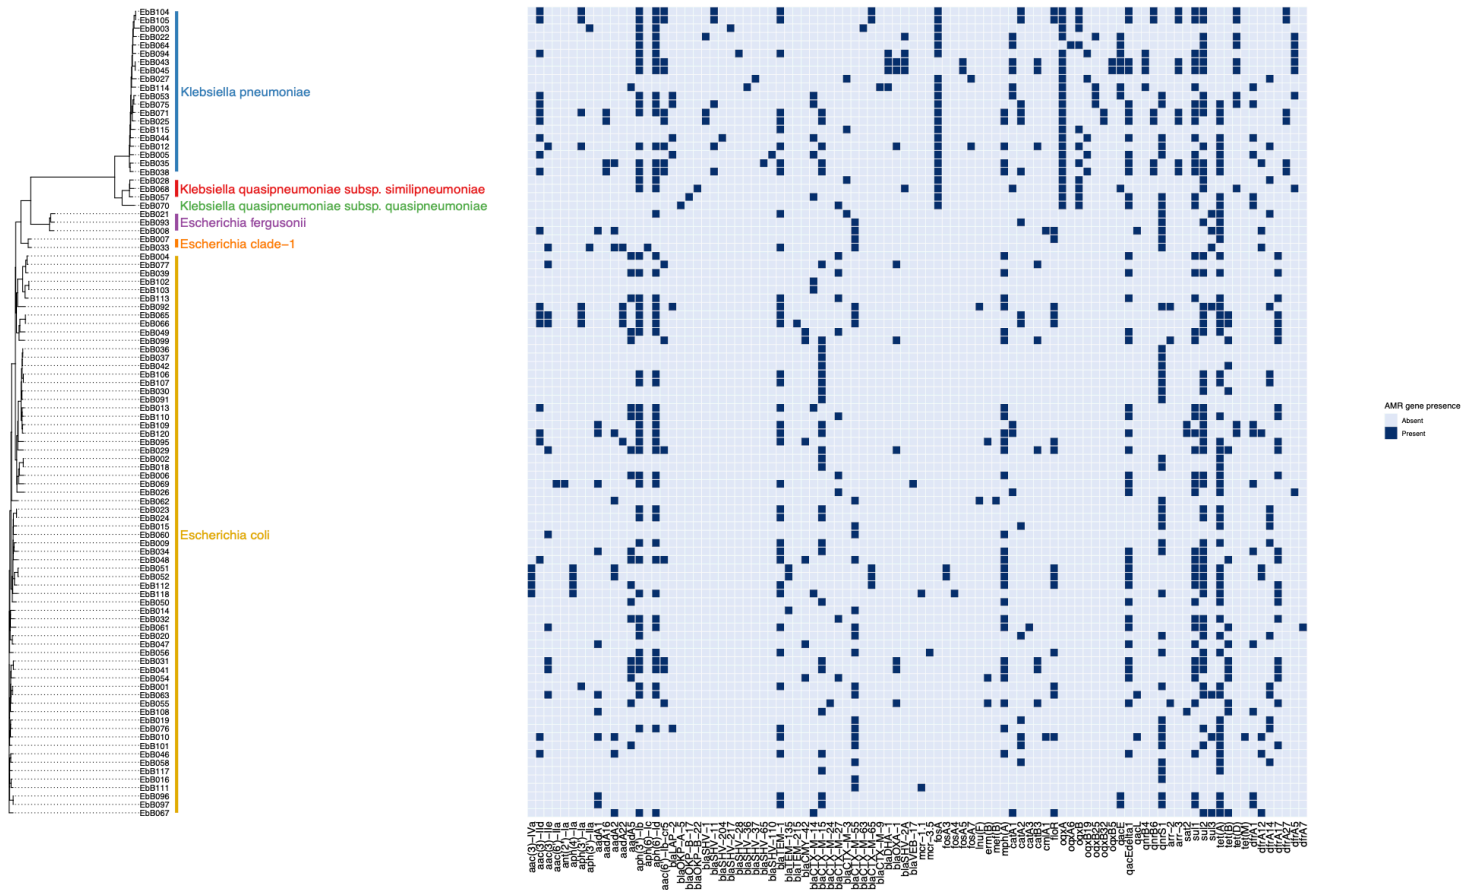

499 **Figure 2:** phylogeny based on mashtree of all samples showing species, and presence of  
500 selected AMR genes in each sample.  
501

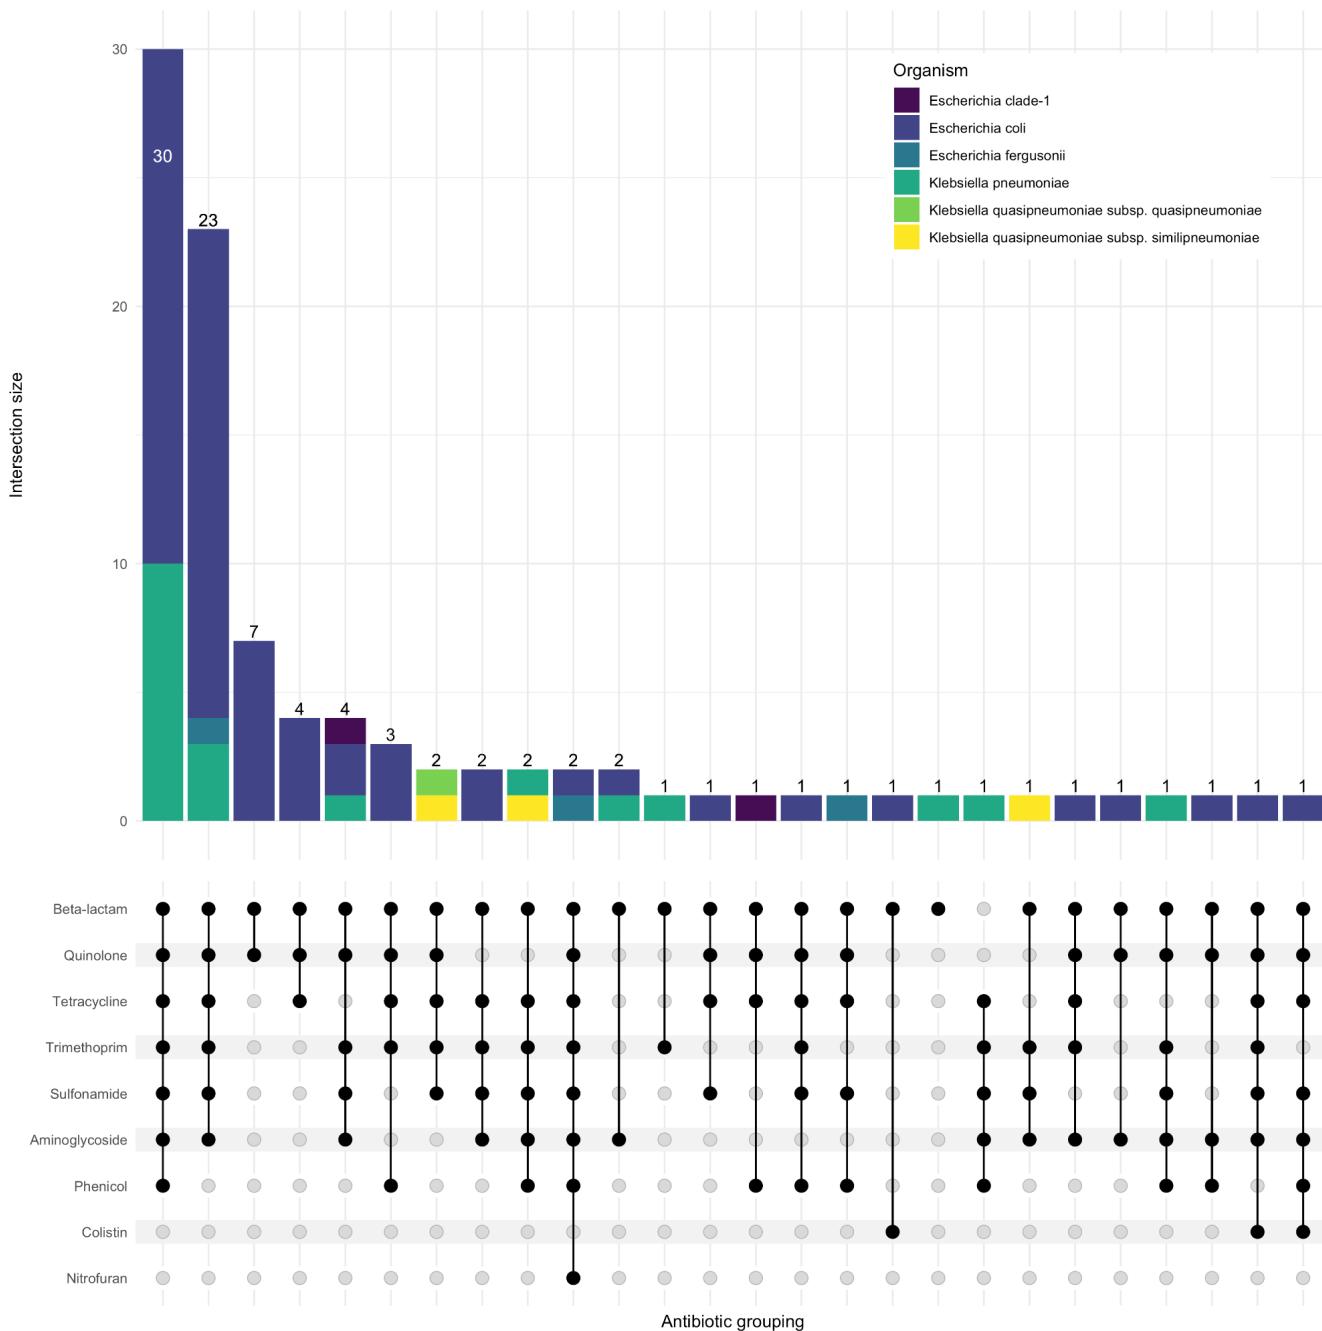

5( 503 **Figure 3:** Upset plot showing shared classes of antimicrobial resistance genes between 504 isolates. Isolate counts are shown as bars, with antimicrobial resistance gene combinations 505 displayed in the lower panel. 506 507

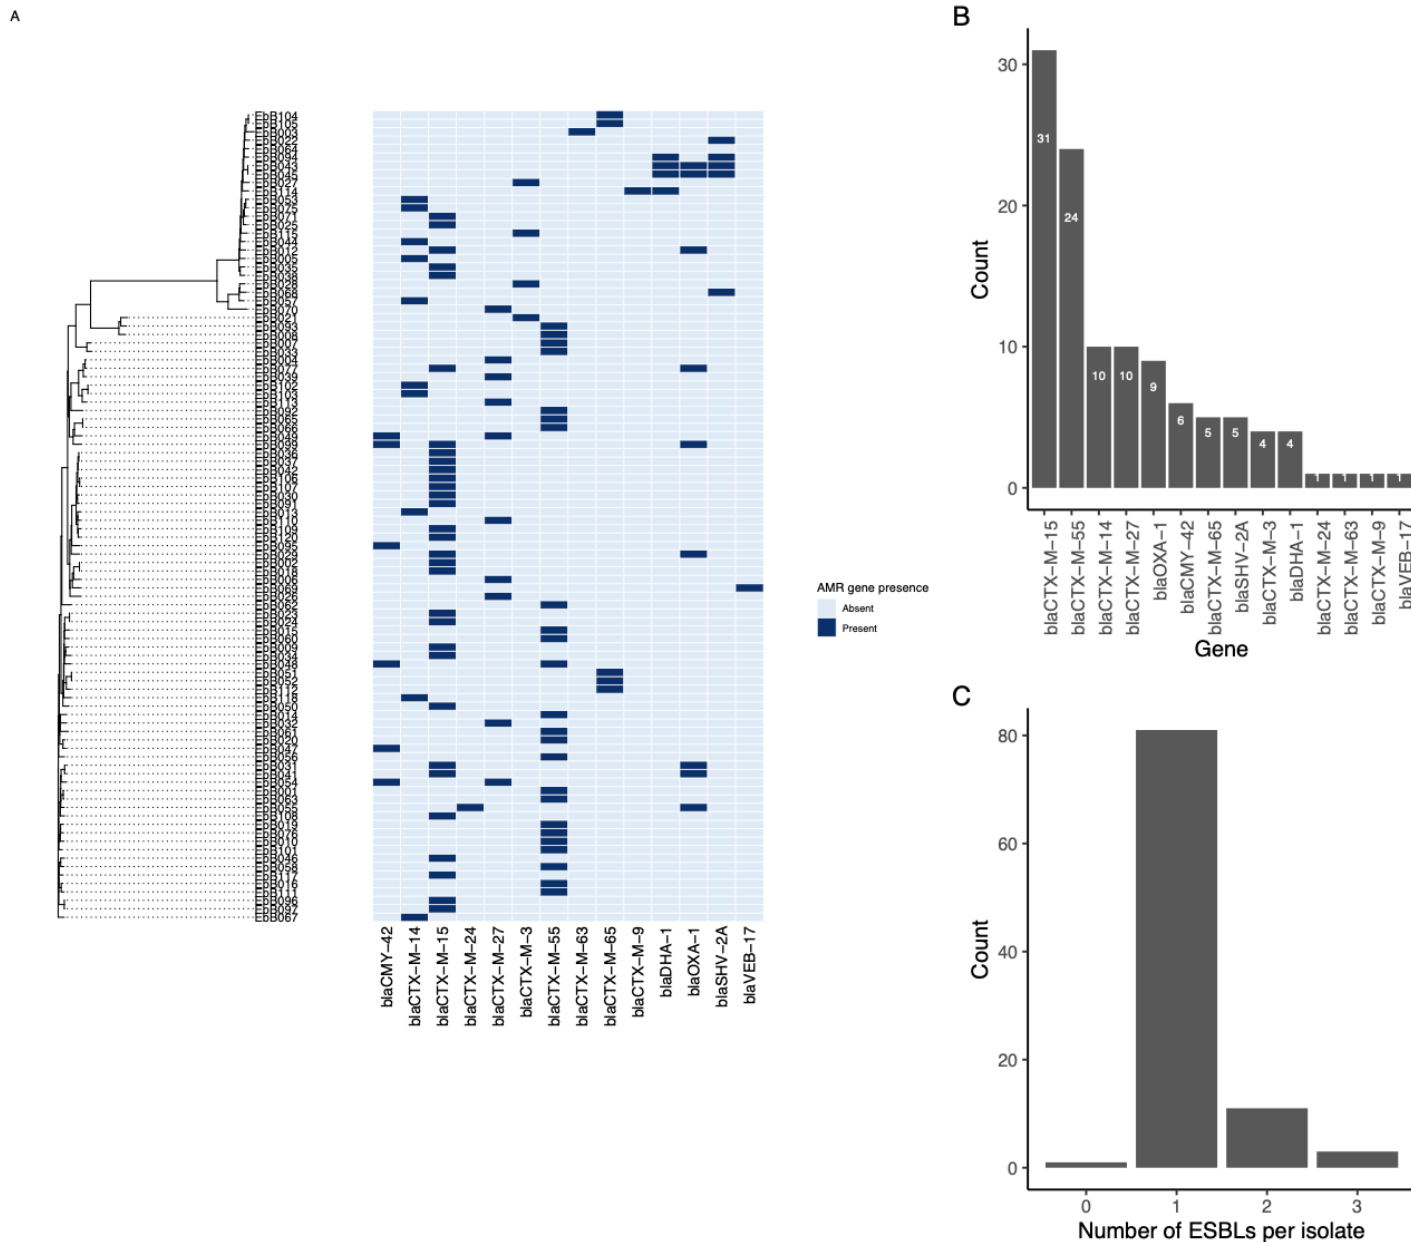

5(  
 509 **Figure 4:** a) Phylogeny from mashtree showing presence/absence of ESBL genes b) frequency  
 510 of ESBL genes in the isolates and c) number of ESBL genes per isolate.  
 511



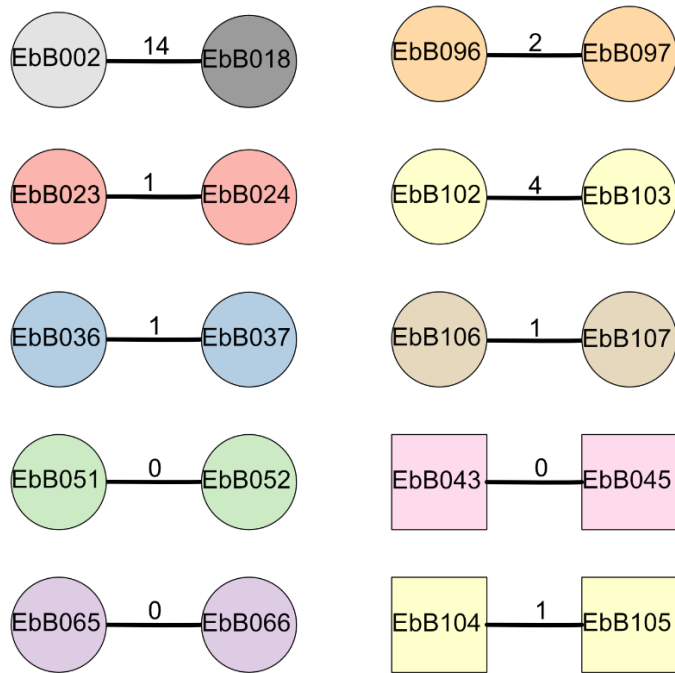

512  
513  
514  
515  
516  
517

**Figure 5:** Diagram of clusters identified using skat. Circles show strains of *E. coli* while squares are *K. pneumoniae*. The number on the bar joining each pair represents the SNP distance between the two strains. Shapes are coloured according to the mother-infant pairs they were isolated from, with grey shapes for strains taken from unpaired individuals.
